# Supplementary material for: Parasite resistance and the adaptive significance of sleep
Source: PubMed Central journal article supplement (PMC2631508; doi:10.1186/1471-2148-9-7), 2009-01-09
Supplement: 1471-2148-9-7-S2.pdf [file 1471-2148-9-7-S2.pdf]

## Additional File 2

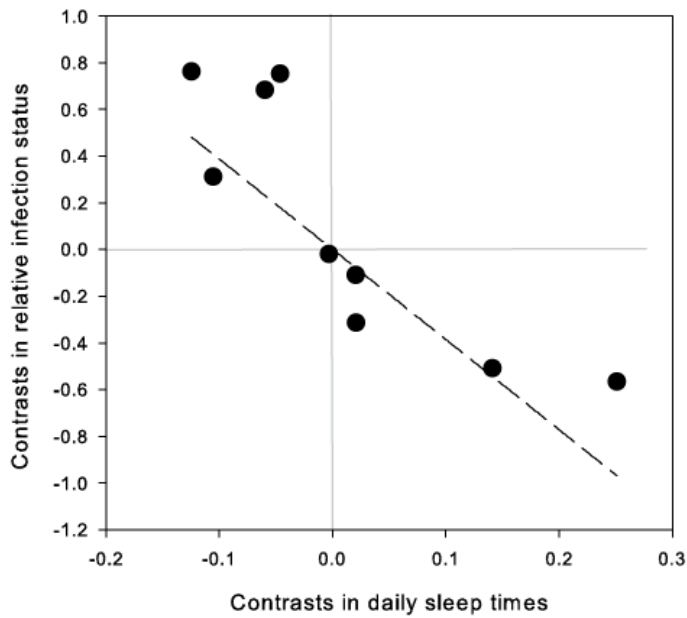

**Figure 3. Sleep and parasitism restricted to EEG studies of sleep.**

A plot of independent contrasts showing relative infection status as a function of daily sleep times. Restricting our analyses to include only EEG studies of sleep does not qualitatively affect our results; regression coefficient = -3.670, s.e. = 0.950,  $t_8 = 3.86$ ,  $P = 0.005$ .

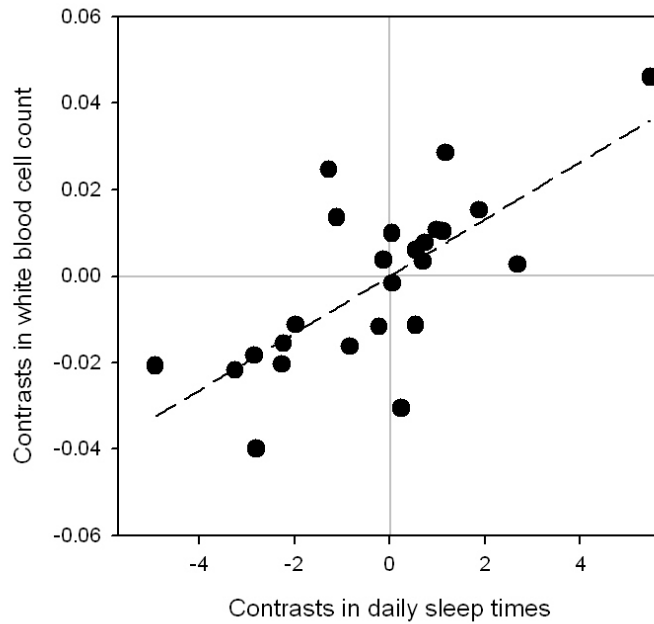

**Figure 4. Sleep and immune defence without control for activity period.** A plot of independent contrasts showing white blood cell counts as a function of daily sleep times; regression coefficient = 0.00655, s.e. = 0.00186,  $t_{23} = 3.52$ ,  $P = 0.002$ . The plot controls for a significant association between white blood cell counts and body size; regression coefficient = 0.00979, s.e. = 0.00372,  $t_{23} = 2.63$ ,  $P = 0.015$ .
